# Supplementary material for: The soluble Decoy Receptor 3 is regulated by a PI3K-dependent mechanism and promotes migration and invasion in renal cell carcinoma
Source: PubMed Central journal article supplement (PMC3852559; doi:10.1186/1476-4598-12-120), 2013-10-10

# Supplementary Figure 1

**A**

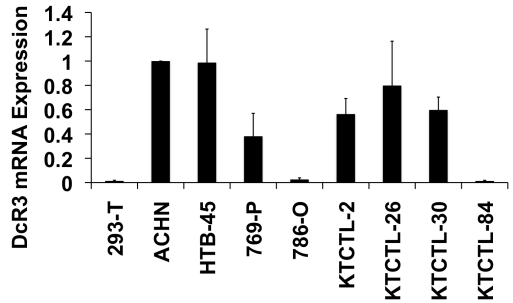

**B**

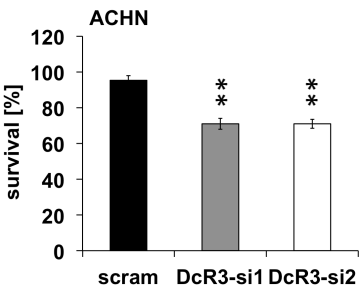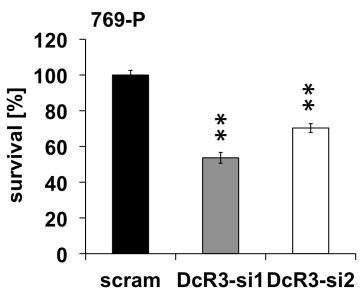

**C**

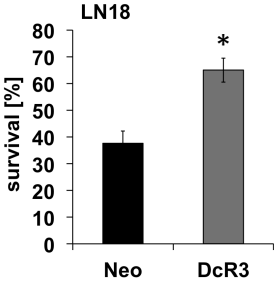

**D**

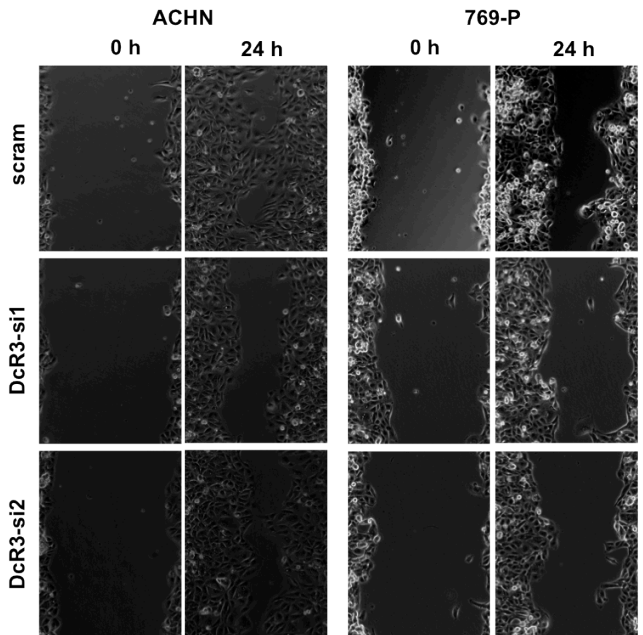

**E**

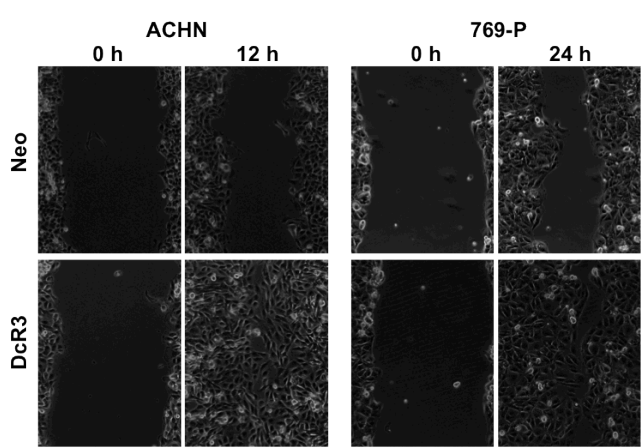

Supplement: 1476-4598-12-120-S1.pdf [file 1476-4598-12-120-S1.pdf]
